# Supplementary material for: Solution plasma synthesis of a boron–carbon–nitrogen catalyst with a controllable bond structure
Source: Royal Society of Chemistry journal article supplement (doi:10.1039/c6cp06063c), 2017-01-01
Supplement: c6cp06063c1.pdf [file c6cp06063c1.pdf]

**Supporting Information**

**Solution Plasma Synthesis of Boron-Carbon-Nitrogen  
Catalyst with Controllable Bond Structure**

**SeungHyo Lee<sup>a,\*</sup>, YongKang Heo<sup>a</sup>, Maria Antoaneta Bratescu<sup>a</sup>, Tomonaga Ueno<sup>a</sup>  
and Nagahiro Saito<sup>a, b</sup>**

<sup>a</sup> Graduate School of Materials Engineering, Nagoya University, Furo-cho, Chikusa-ku,  
Nagoya, Japan

<sup>b</sup> CREST, Japan Science and Technology Agency, Goban-cho, Chiyoda-ku, Tokyo,  
Japan

Corresponding author : seunghyo@rd.numse.nagoya-u.ac.jp

**Koutecky–Levich (K–L) analysis** <sup>43</sup>

$$1/j = 1/j_L + 1/j_k \quad (1)$$

$$1/j = 1/B\omega^{1/2} + 1/j_k \quad (2)$$

$$B = 0.201 n F A C_{O_2} D_o^{2/3} \nu^{-1/6} \omega^{1/2} \quad (3)$$

where,  $j$  is the measured current density (mA/cm<sup>2</sup>),  $j_k$  and  $j_L$  are the kinetic and diffusion-limiting current densities (mA/cm<sup>2</sup>),  $\omega$  is the angular velocity of the disk in rpm,  $F$  is the Faradays constant ( $F = 96485 \text{ C mol}^{-1}$ ),  $n$  is the number of electrons transferred per oxygen molecule,  $C_o^*$  and  $D_o$  are the oxygen bulk concentration ( $1.2 \times 10^{-3} \text{ mol cm}^{-3}$ ) and diffusion coefficient of  $O_2$  ( $1.9 \times 10^{-5} \text{ cm}^2 \text{ s}^{-1}$ ), respectively, and  $\nu$  is the kinematic viscosity of the electrolyte ( $1.1 \times 10^{-2} \text{ cm}^2 \text{ s}^{-1}$ ).

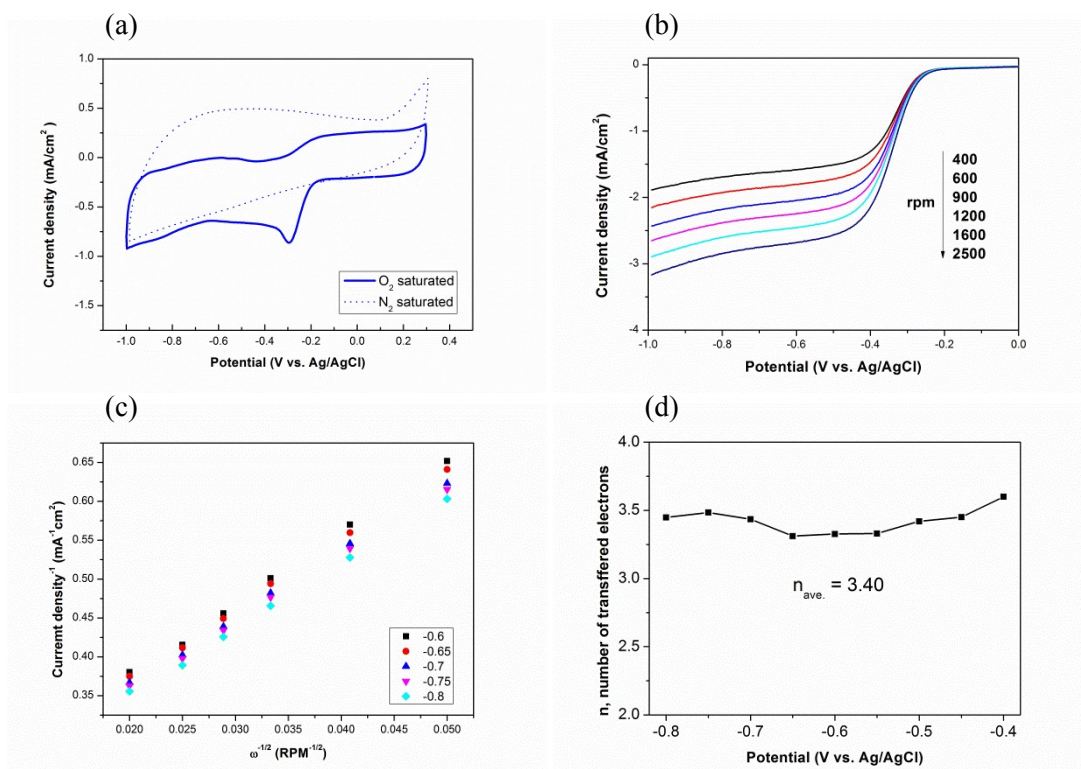

**Fig. S1** Electrochemical measurements of B/N uncoupling: (a) CV curves of the ORR in O<sub>2</sub> and N<sub>2</sub>-saturated 0.1M KOH solutions at a scan rate of 10 mV s<sup>-1</sup>. (b) LSV curves of the ORR in O<sub>2</sub>-saturated 0.1 M KOH solution at a scan rate of 10 mV s<sup>-1</sup> with different rotation speeds from 400 to 2500 rpm. (c) The Koutecky-Levich (K-L) plots of current density<sup>-1</sup> versus  $\omega^{-1/2}$  at various potentials obtained from LSV curves in an O<sub>2</sub>-saturated 0.1 M KOH solution at a scan rate of 10 mV s<sup>-1</sup>. (d) The number of transferred electrons calculated from the slopes of the K-L plots in (c).

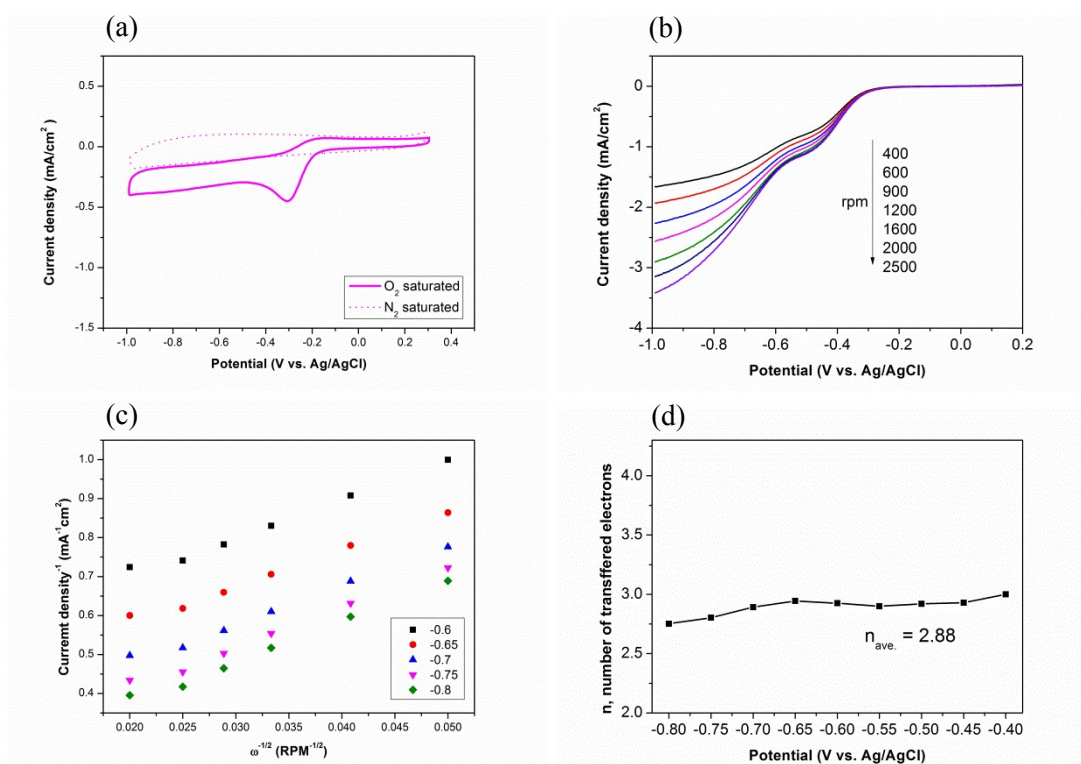

**Fig. S2** Electrochemical measurements of B/N coupling: (a) CV curves of the ORR in O<sub>2</sub> and N<sub>2</sub>-saturated 0.1M KOH solutions at a scan rate of 10 mV s<sup>-1</sup>. (b) LSV curves of the ORR in O<sub>2</sub>-saturated 0.1 M KOH solution at a scan rate of 10 mV s<sup>-1</sup> with different rotation speeds from 400 to 2500 rpm. (c) The Koutecky-Levich (K-L) plots of current density<sup>-1</sup> versus  $\omega^{-1/2}$  at a various potentials obtained from LSV curves in an O<sub>2</sub>-saturated 0.1 M KOH solution at a scan rate of 10 mV s<sup>-1</sup>. (d) The number of transferred electrons calculated from the slopes of the K-L plots in (c).

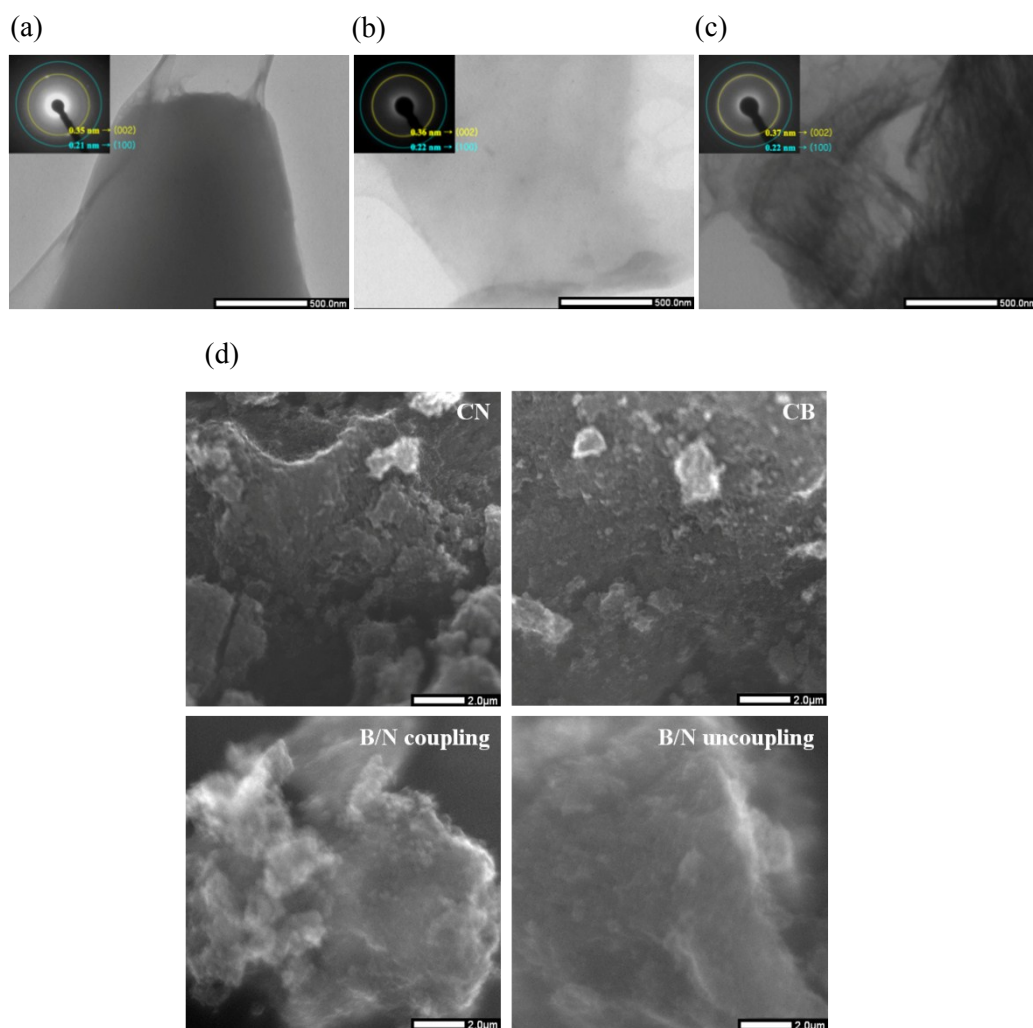

**Fig. S3** Wide-field TEM images with selected-area electron diffraction (SAED) of (a) CB, (b) CN, and (c) B/N coupling. (d) SEM images of all nanocarbons.

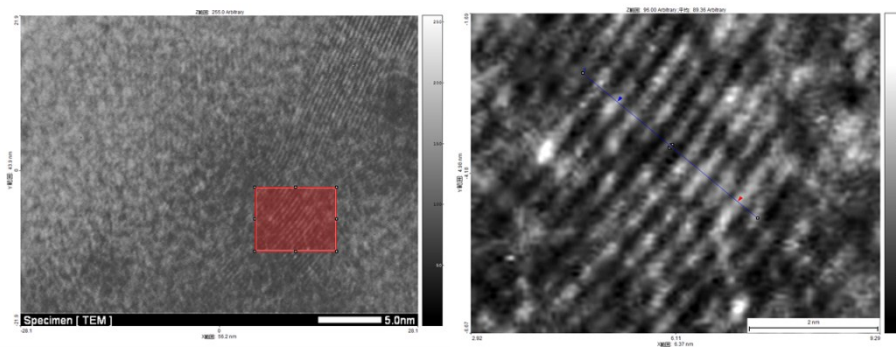

**Fig. S4** Contrast line profiles of B/N uncoupling.

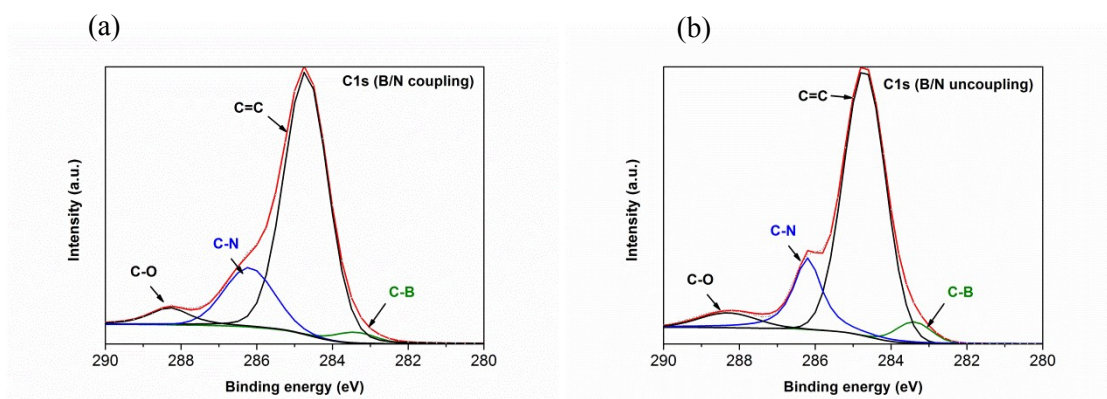

**Fig. S5** Narrow scan XPS of (a) B/N uncoupling and (b) B/N coupling for C1s. The four deconvoluted peaks in the high resolution C1s spectrum at 283.4, 284.7, 286.2 and 288.3 eV can be attributed to C-B, C=C, C-N and C-O bonds, respectively.<sup>13</sup>

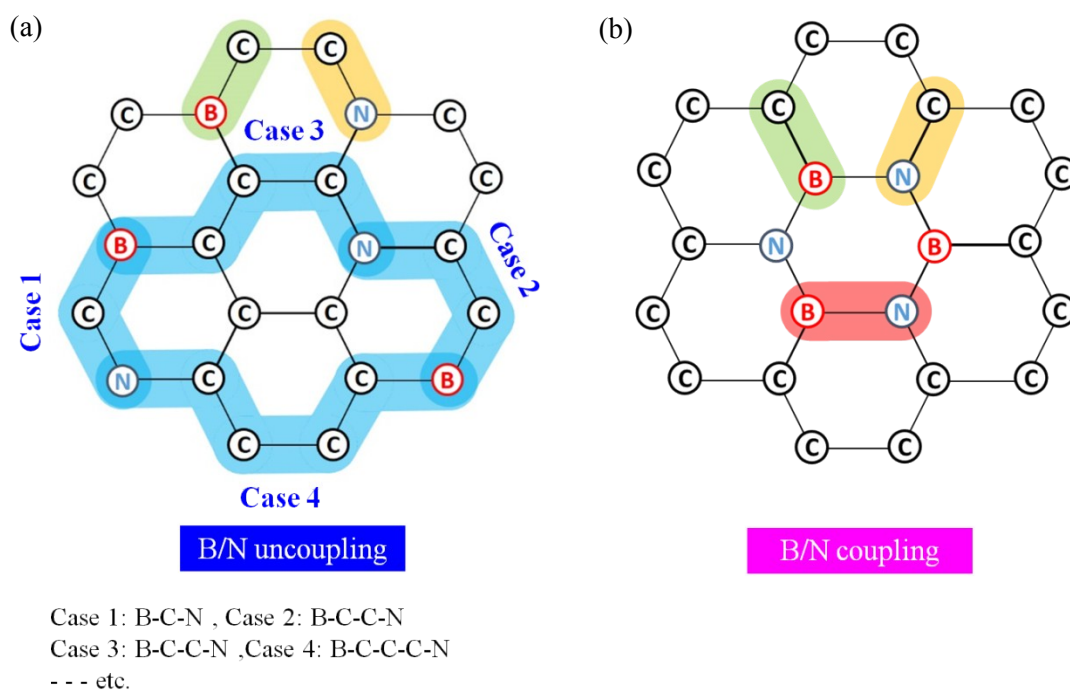

**Fig. S6** Possible schematic structure of BCN nanocarbon: (a) B/N uncoupling and (b) B/N coupling.

**Table S1** Relative content of (a) B atom (b) N atom and (c) Pt atom before and after chronoamperometry test.

| (a) Chemical state containing B atom (%) |           |                  |                 |                   |                  |                               |     |
|------------------------------------------|-----------|------------------|-----------------|-------------------|------------------|-------------------------------|-----|
|                                          | B cluster | B <sub>4</sub> C | BC <sub>3</sub> | BC <sub>2</sub> O | BCO <sub>2</sub> | B <sub>2</sub> O <sub>3</sub> | B-N |
| Before                                   | 23.2      | 8.9              | 8.9             | 25                | 14.3             | 16.1                          | 3.6 |
| After                                    | 5.5       | 12.7             | 12.7            | 18.2              | 25.5             | 21.8                          | 3.6 |

  

| (b) Chemical state containing N atom (%) |     |             |            |             |          |
|------------------------------------------|-----|-------------|------------|-------------|----------|
|                                          | B-N | Pyridinic N | Pyrrolic N | Graphitic N | Oxidic N |
| Before                                   | 0   | 28.6        | 31.4       | 39.4        | 0.6      |
| After                                    | 0   | 31.3        | 31.6       | 32.6        | 4.5      |

  

| (c) Chemical state containing Pt atom (%) |                          |                          |                          |                          |                         |                         |
|-------------------------------------------|--------------------------|--------------------------|--------------------------|--------------------------|-------------------------|-------------------------|
|                                           | Pt <sup>4+</sup> (4f5/2) | Pt <sup>4+</sup> (4f7/2) | Pt <sup>2+</sup> (4f5/2) | Pt <sup>2+</sup> (4f7/2) | Pt <sup>0</sup> (4f5/2) | Pt <sup>0</sup> (4f7/2) |
| Before                                    | 2.8                      | 3.1                      | 7.5                      | 11                       | 40.8                    | 34.8                    |
| After                                     | 4.6                      | 5.6                      | 15.8                     | 20.1                     | 26                      | 27.9                    |



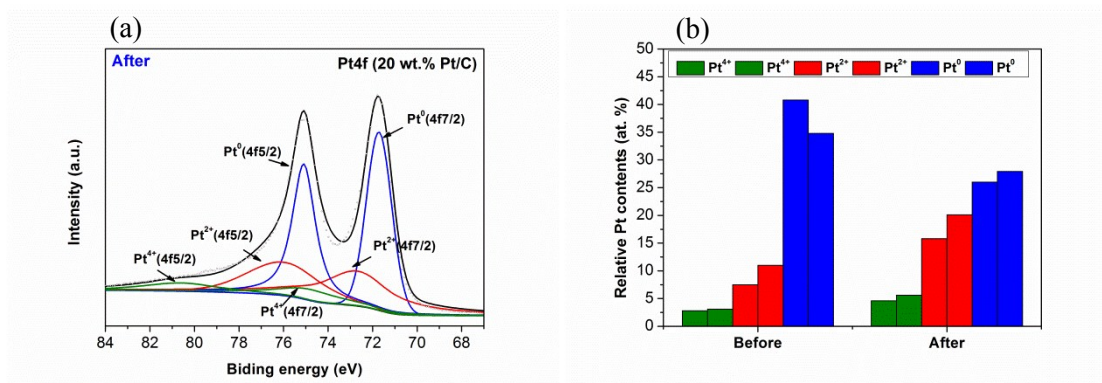

**Fig. S7** XPS narrow scan after durability experiment of (a) Pt4f of 20 wt. % Pt/C and the relative element contents before and after the chronoamperometry for (b) Pt.

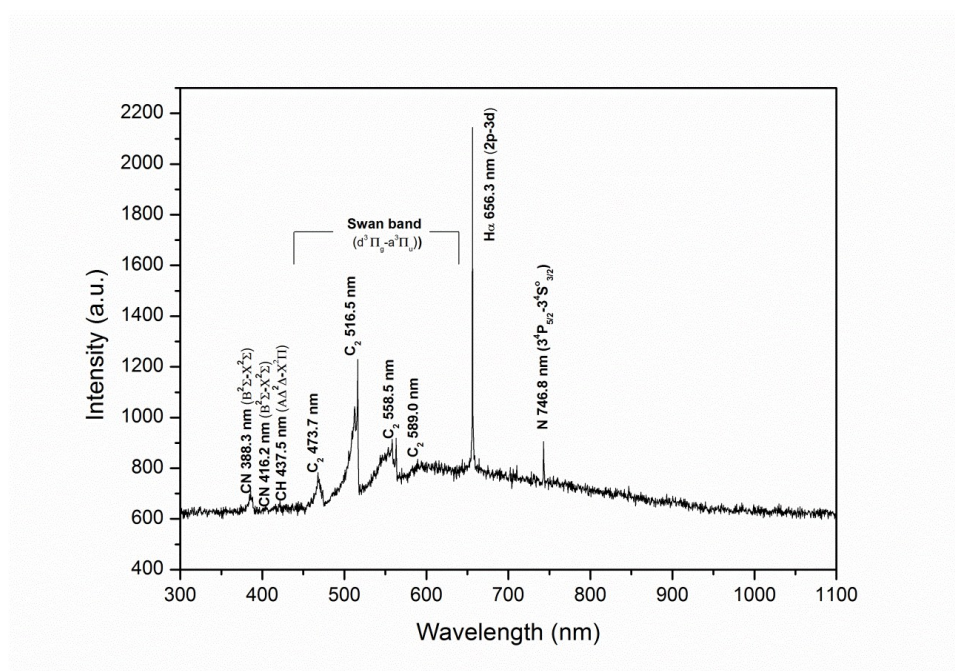

**Fig. S8** OES spectra of the SPP in pure pyridine for synthesis CN (nitrogen doped carbon).
